# Supplementary material for: Selectivec-MYCG4 DNA recognition based on a fluorescent light-up probe with disaggregation-induced emission characteristics
Source: Royal Society of Chemistry journal article supplement (doi:10.1039/d2tb01316a), 2022-01-01
Supplement: d2tb01316a1.pdf [file d2tb01316a1.pdf]

## Supplementary Information

### **Selective *c-MYC* G4 DNA recognition based on a fluorescent light-up probe with disaggregation-induced emission characteristics**

Hong-Yao Li, Hao-Wen Cao, Xue-Xian Lang, Yan-Song Chen, Ming-Qi Wang\*

*School of Pharmacy, Jiangsu University, Zhenjiang, 212013, P. R. China; Email:wmq3415@163.com*

---

## 1. Sequence alignments of oligonucleotides

| Name                    | Sequence (from 5' to 3')       | Structure in K <sup>+</sup> solution |
|-------------------------|--------------------------------|--------------------------------------|
| EAD                     | CTGGGTGGGTGGGTGGGA             | G-quadruplex                         |
| TBA                     | GGTTGGTGTGGTTGG                | G-quadruplex                         |
| c-MYC                   | TTGAGGGTGGGTAGGGTGGGTA         | G-quadruplex                         |
| 21CTA                   | GGGCTAGGGCTAGGGCTAGGG          | G-quadruplex                         |
| TRF2                    | CGGG AGGG CGGG GAGG GC         | G-quadruplex                         |
| VAV1                    | GGGC AGGG AGGG AACT GGG        | G-quadruplex                         |
| Ckit1                   | AGGG AGGG CGCT GGA GGA GGG     | G-quadruplex                         |
| Hum24                   | TTAGGGTTAGGGTTAGGGTTAGGG       | G-quadruplex                         |
| ODN                     | GGGATGGGACACAGGGGACGGG         | G-quadruplex                         |
| ACS20                   | GGCTTAGGCTTAGGCTTAGG           | G-quadruplex                         |
| Ckit3                   | GG CGA GG AGGGG CGT GG CC GGC  | G-quadruplex                         |
| HRAS                    | TC GGGTTGCGGG CGCAGGGCACGGG CG | G-quadruplex                         |
| bm                      | TAGGTTAGGTTAGGTTAGG            | G-quadruplex                         |
| 22AG                    | AGGG TTAG GGTT AGGG TTAG GG    | G-quadruplex                         |
| G3T3                    | GGGTTTGGGTTTGGGTTTGGG          | G-quadruplex                         |
| BC12                    | GGGCGGGCGCGGGAGGAAGGGGGCGGG    | G-quadruplex                         |
| VEGF                    | GGGGCGGGCCGGGGGGCGGGG          | G-quadruplex                         |
| Polyd(A-T) <sub>9</sub> | ATATATATATATATATAT             | Duplex                               |
| Polyd(A-T) <sub>2</sub> | GCA TGC GCG CGC GCA TGC        | Duplex                               |
| Polyd(A-T) <sub>5</sub> | GCGCAT ATA TAT ATGCGC          | Duplex                               |
| ds26                    | CAATCGGATCGAATTCGATCGATTG      | Duplex                               |
| ss26                    | ATACGATGCTTCACGGTGCTATCTG      | Single-stranded                      |

**Table S1.** Sequence alignments of oligonucleotides used in the present study.

## 2. <sup>1</sup>H NMR, <sup>13</sup>C NMR and HRMS spectra

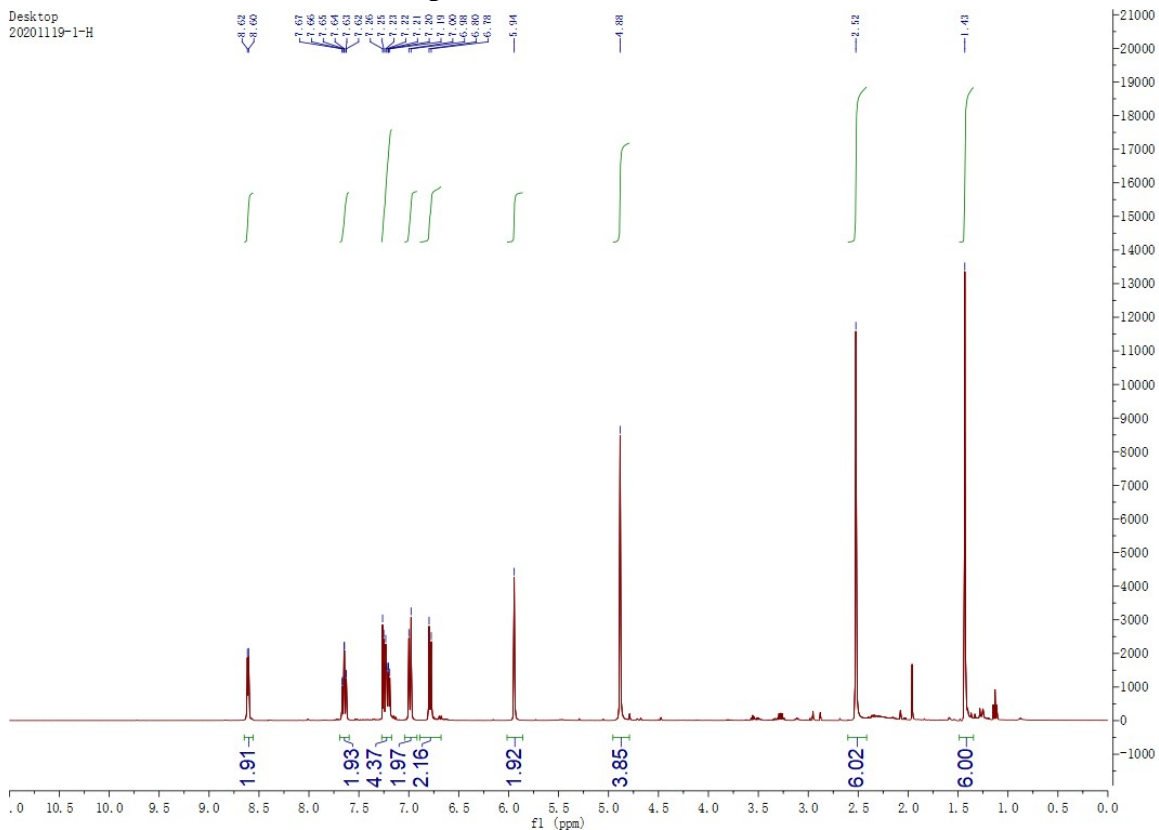

<sup>1</sup>H NMR spectrum of compound 1

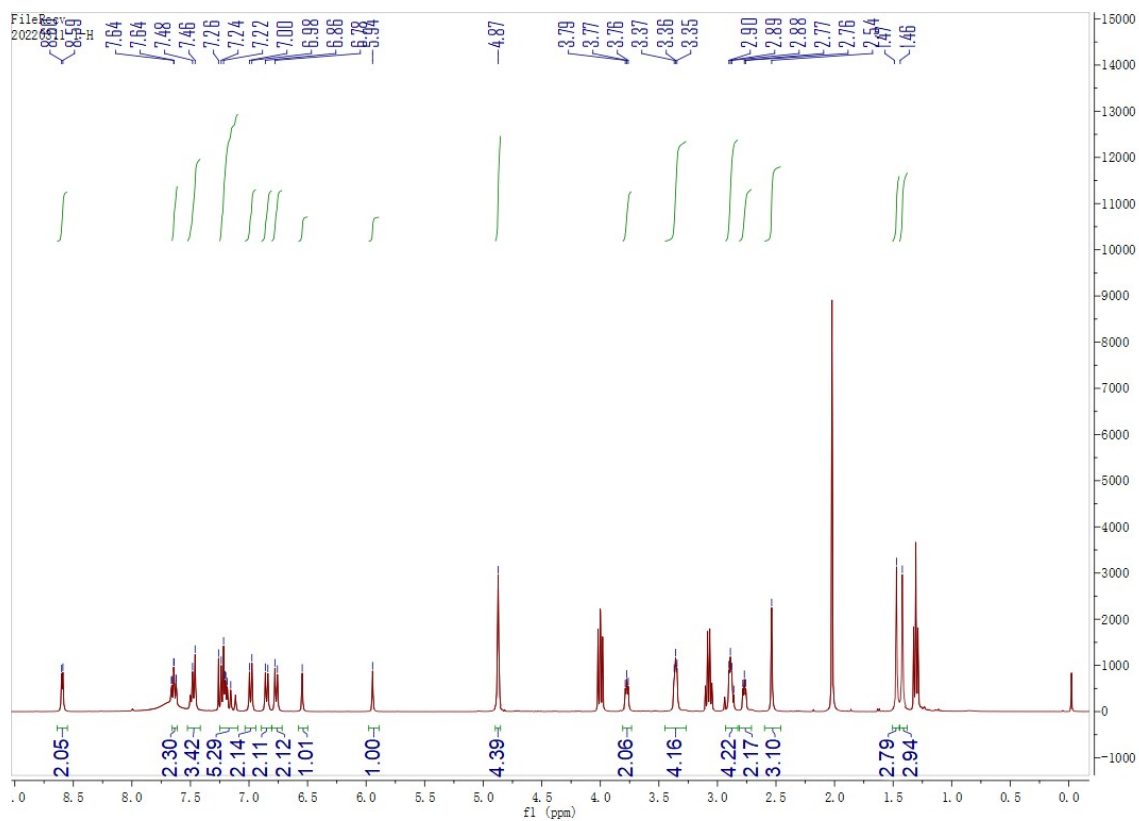

<sup>1</sup>H NMR spectrum of compound MRY-3

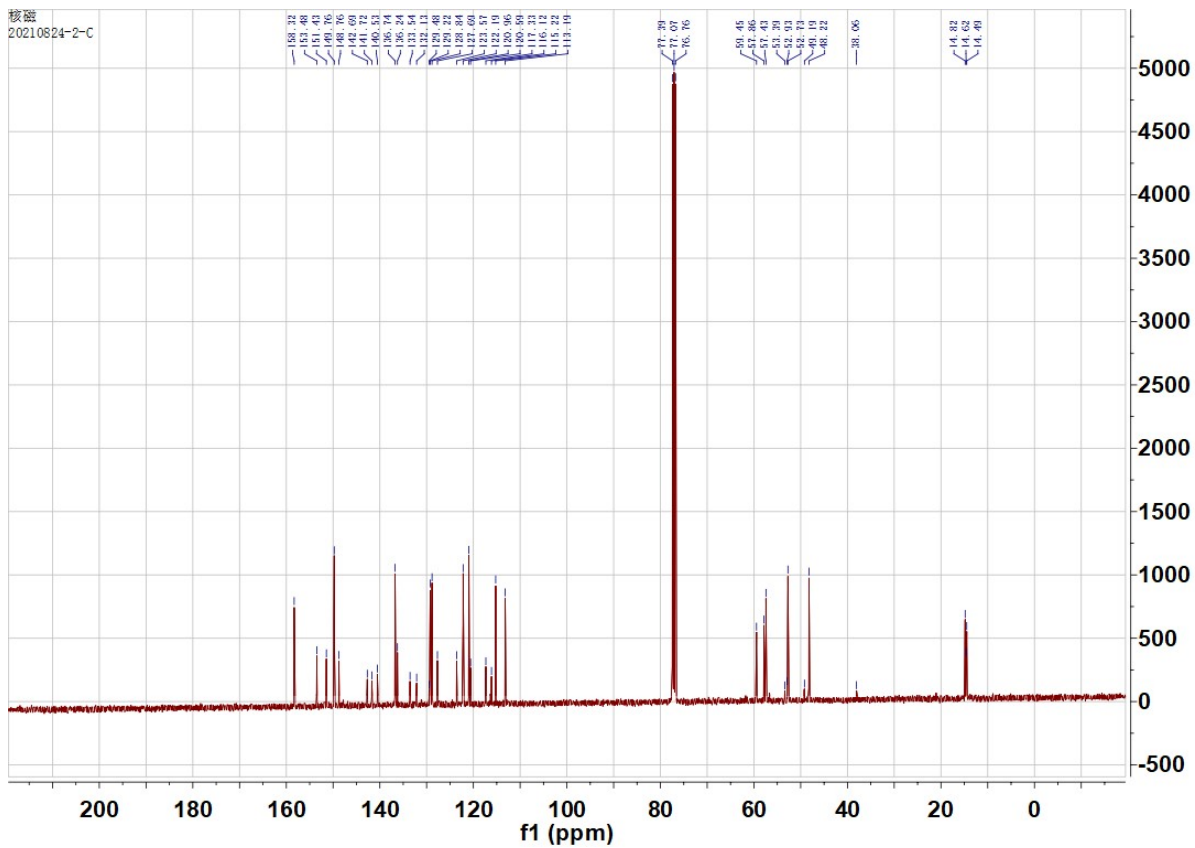

$^{13}\text{C}$  NMR spectrum of MRY-3

MRY #829 RT: 4.26 AV: 1 NL: 5.51E9  
T: FTMS + c ESI Full ms [70.0000-1050.0000]

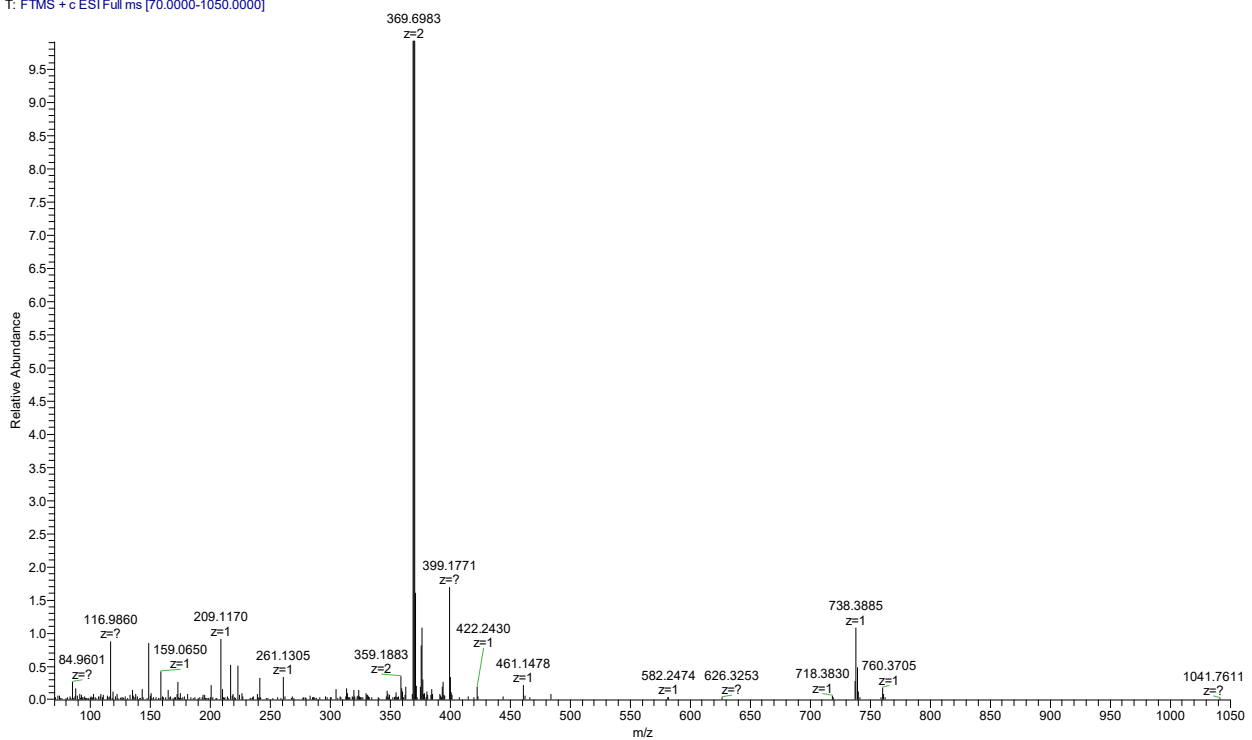

HRMS spectrum of MRY-3

### 3. CD spectra for various G4 structures.

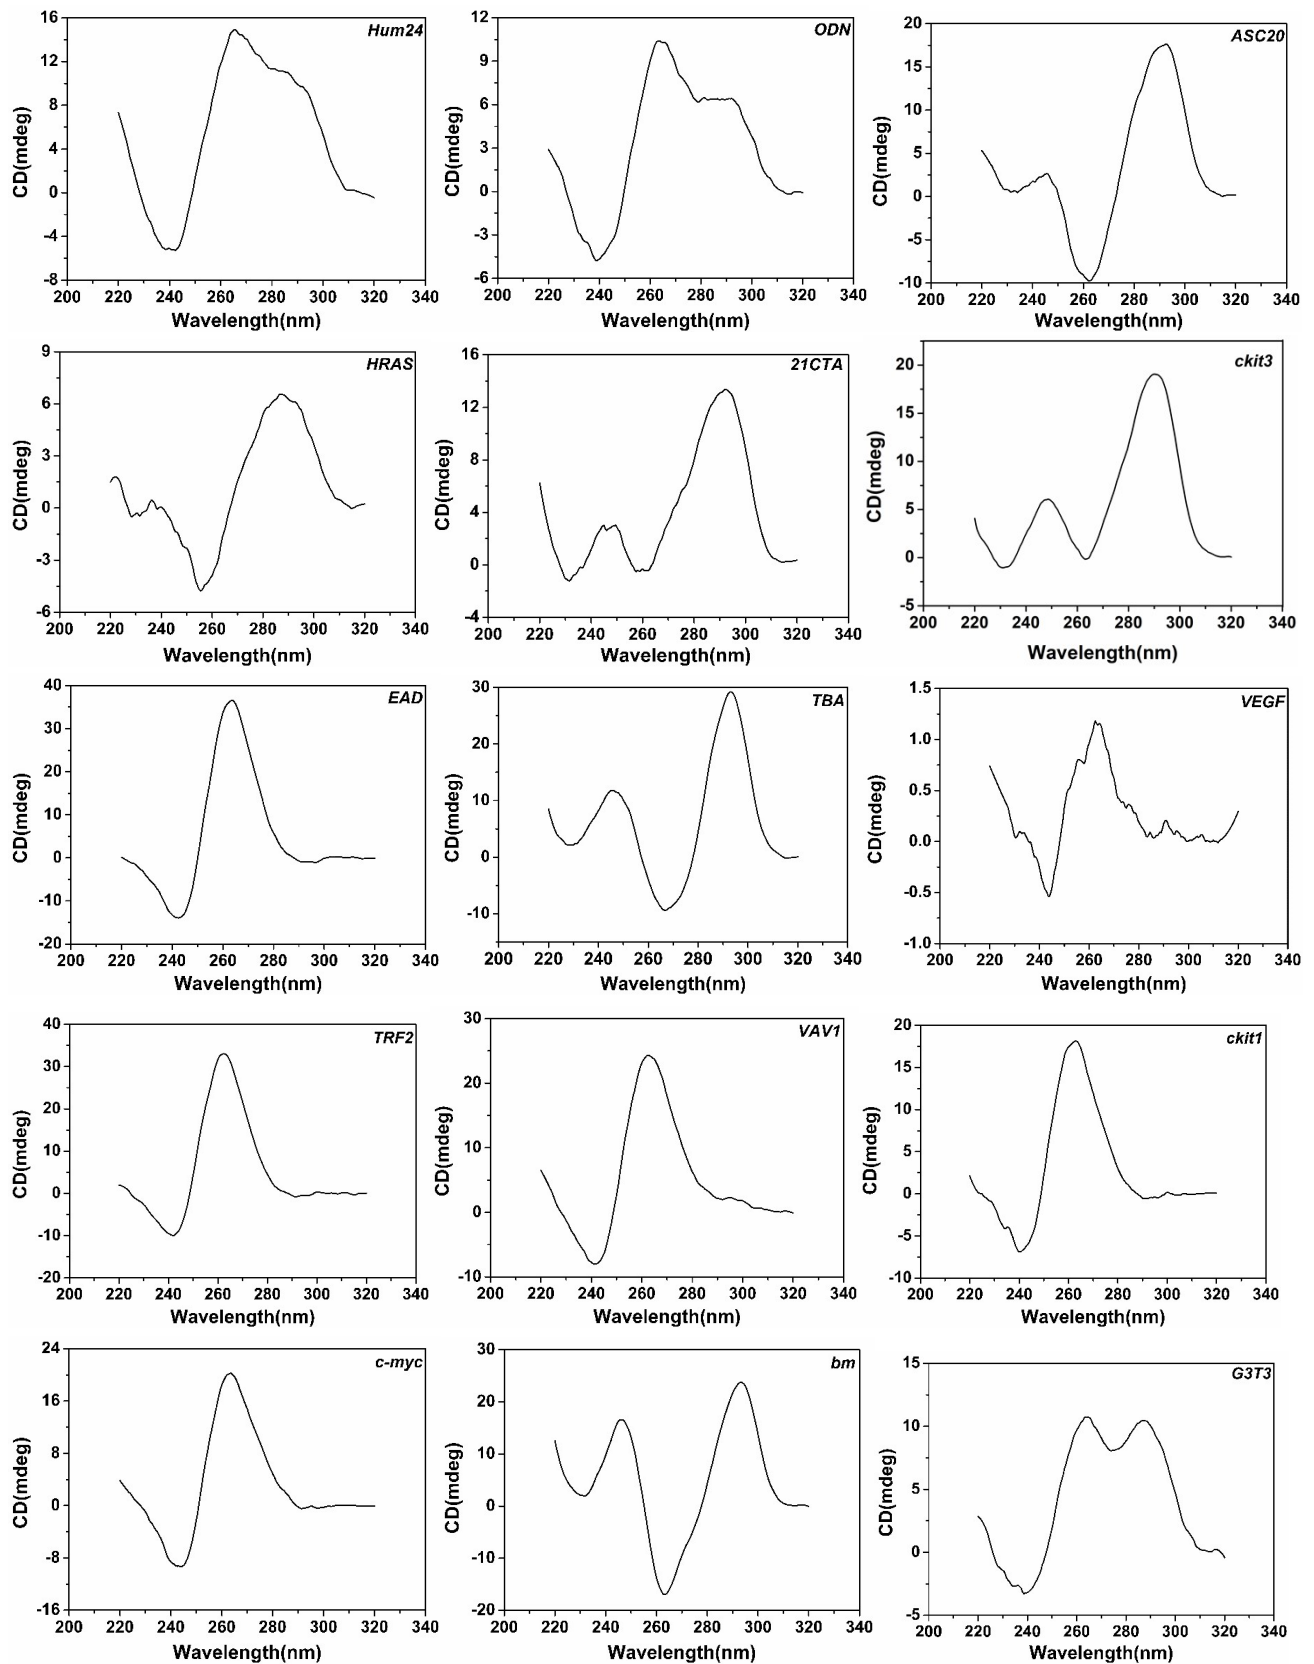

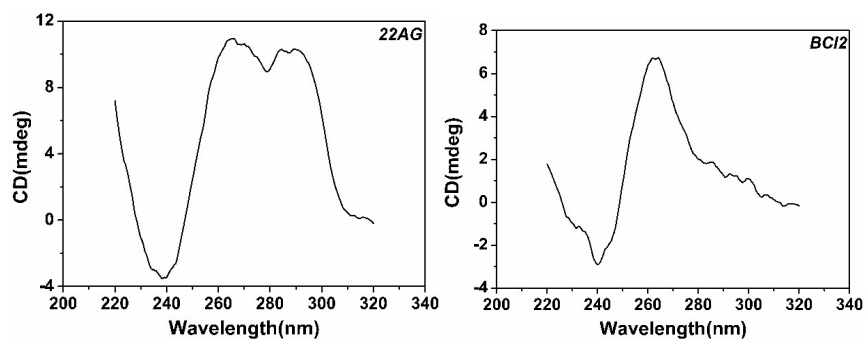

Fig. S1. CD spectra for various G4 structures (4  $\mu$ M) in 10 mM Tris-HCl, pH = 7.4, 60 mM KCl.

#### 4. Fluorescence titration curve of MRY-3 with c-MYC G4 DNAs.

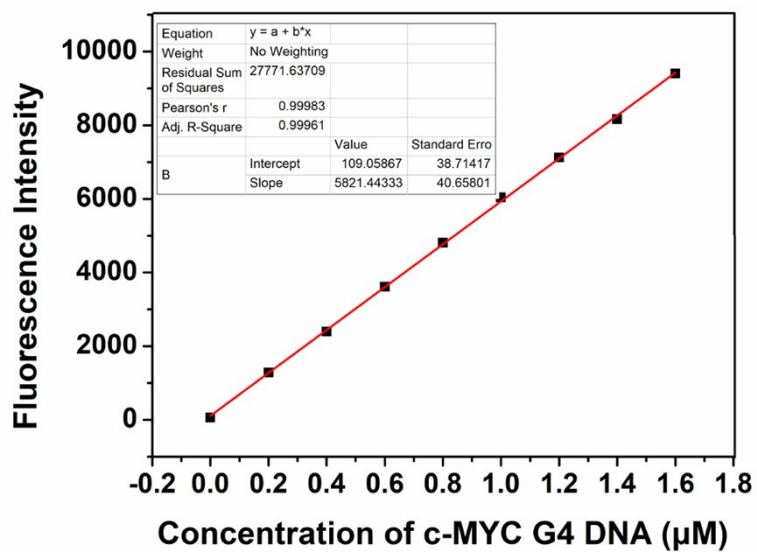

Fig. S2. The linear fit equation for calculating LOD value between MRY-3 and c-MYC G4 DNA at 600 nm.

## 5. Fluorescence titrations of MRY-3 with G4 and non-G4 DNAs.

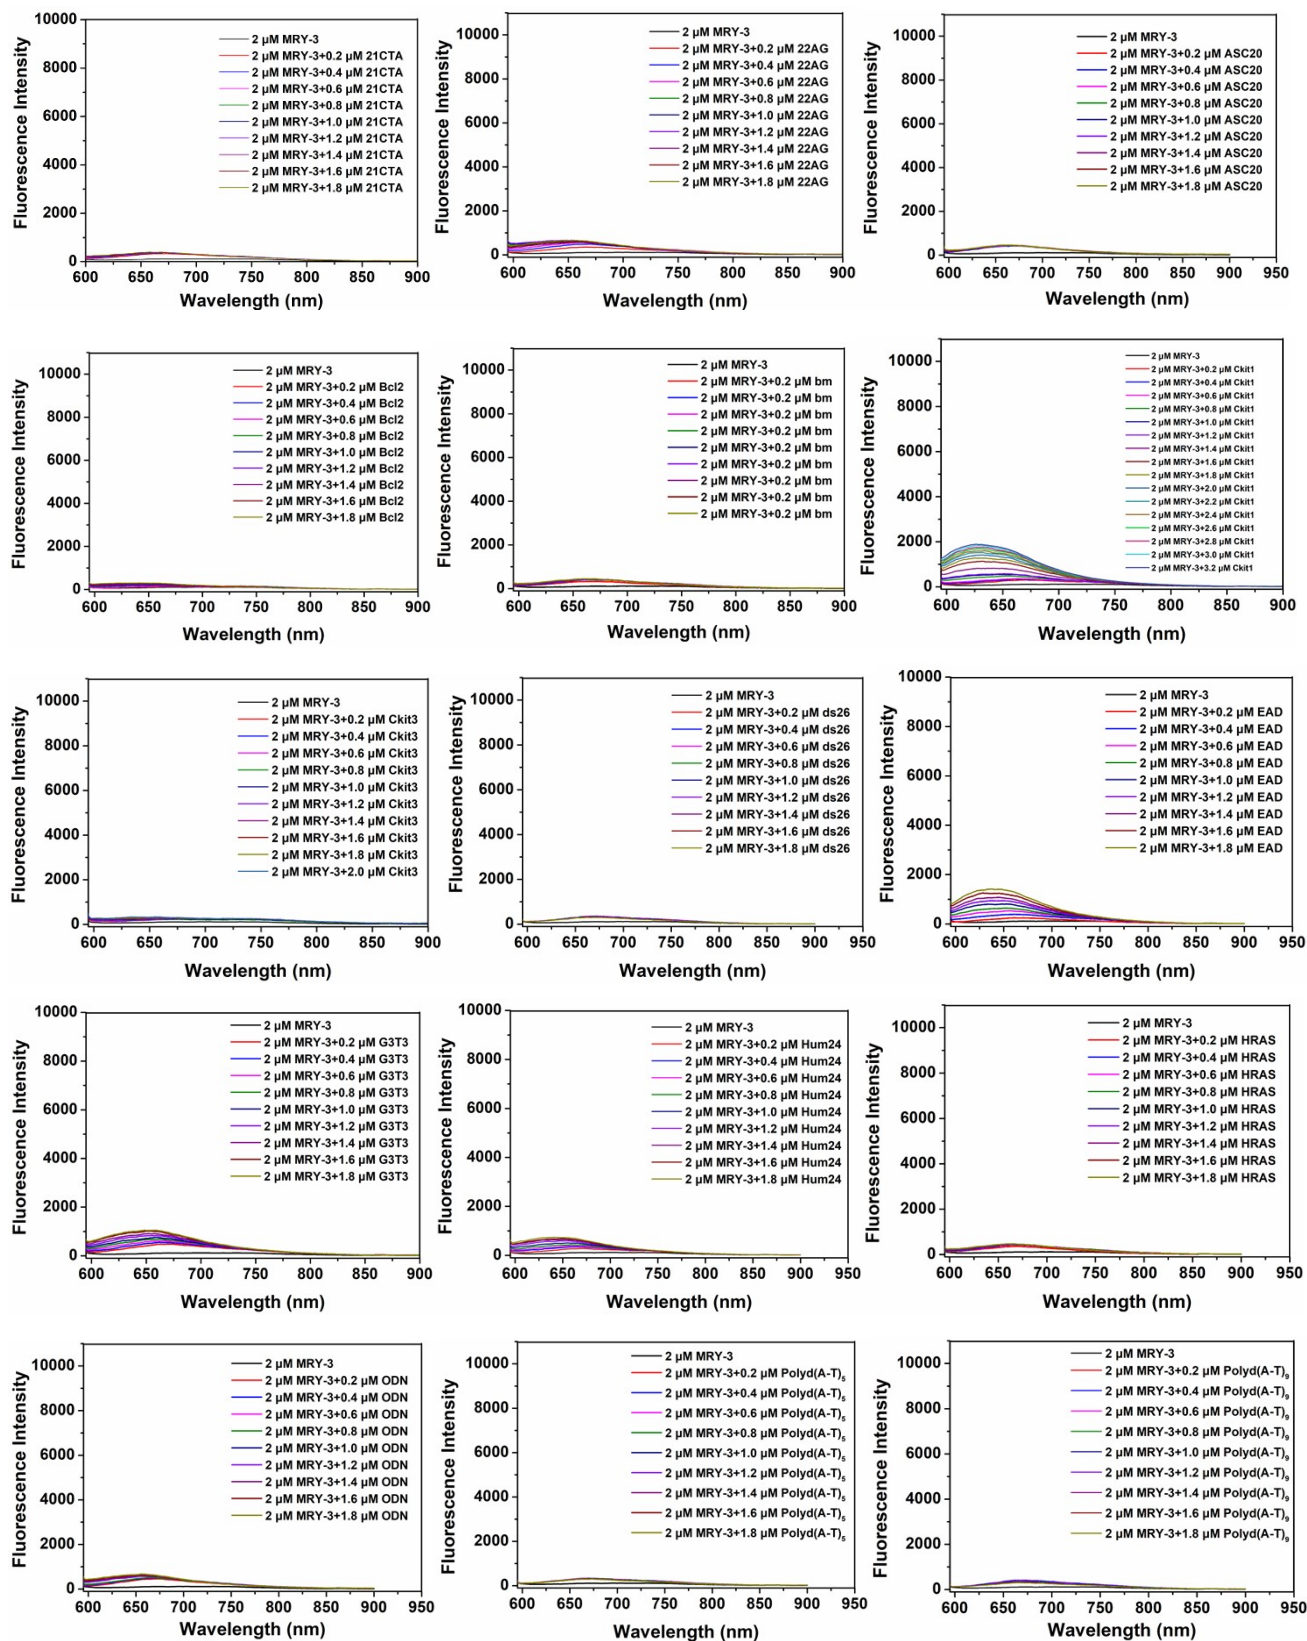



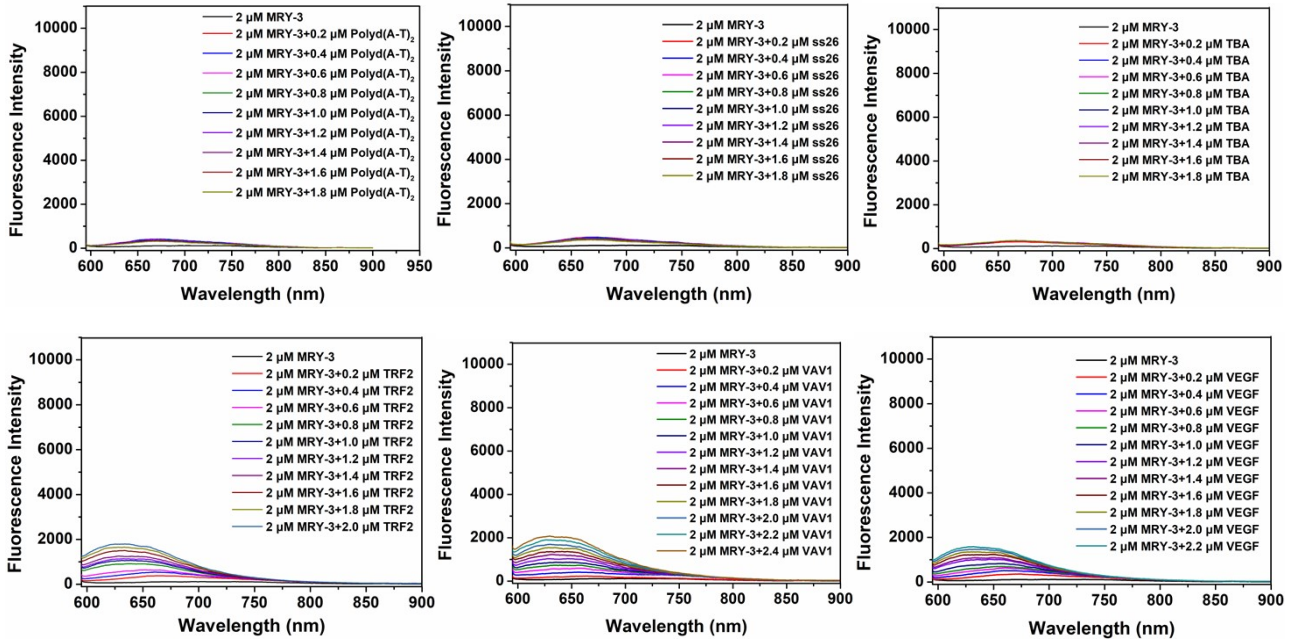

**Fig. S3.** Fluorescence titrations of **MRY-3** (2  $\mu\text{M}$ ) upon addition of increasing amount of anti-parallel G4 DNAs-21CTA, ASC20, bm, Ckit3, HRAS, TBA; hybrid DNAs-22AG, hum24, ODN, G3T3; parallel G4 DNAs- Bcl2, Ckit1, EAD, TRF2, VAV1, VEGF; double-stranded DNAs-Polyd(A-T)<sub>5</sub>, Polyd(A-T)<sub>9</sub>, Polyd(A-T)<sub>2</sub>, ds26 and single-stranded DNA-ss26.

## 6. Competition experiments.

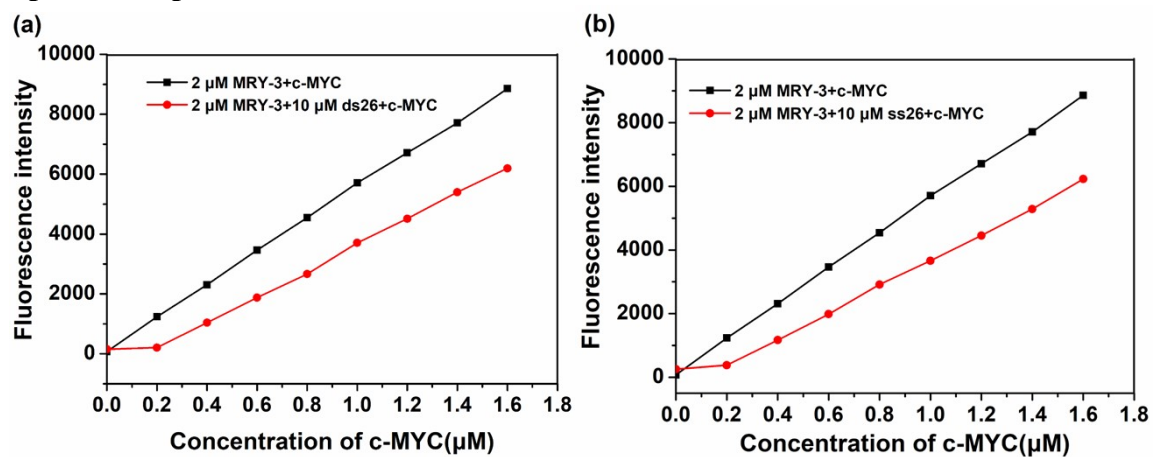

**Fig. S4.** The fluorescence titration of 2  $\mu\text{M}$  MR-3 with the stepwise addition of the c-MYC without and with 10  $\mu\text{M}$  ds26 (a) or ss26 (b) in 10 mM Tris-HCl/DMSO (95:5, v/v), 60 mM KCl, pH 7.4

## 7. Absorbance titrations of MRY-3 with G4 and non-G4 DNAs.

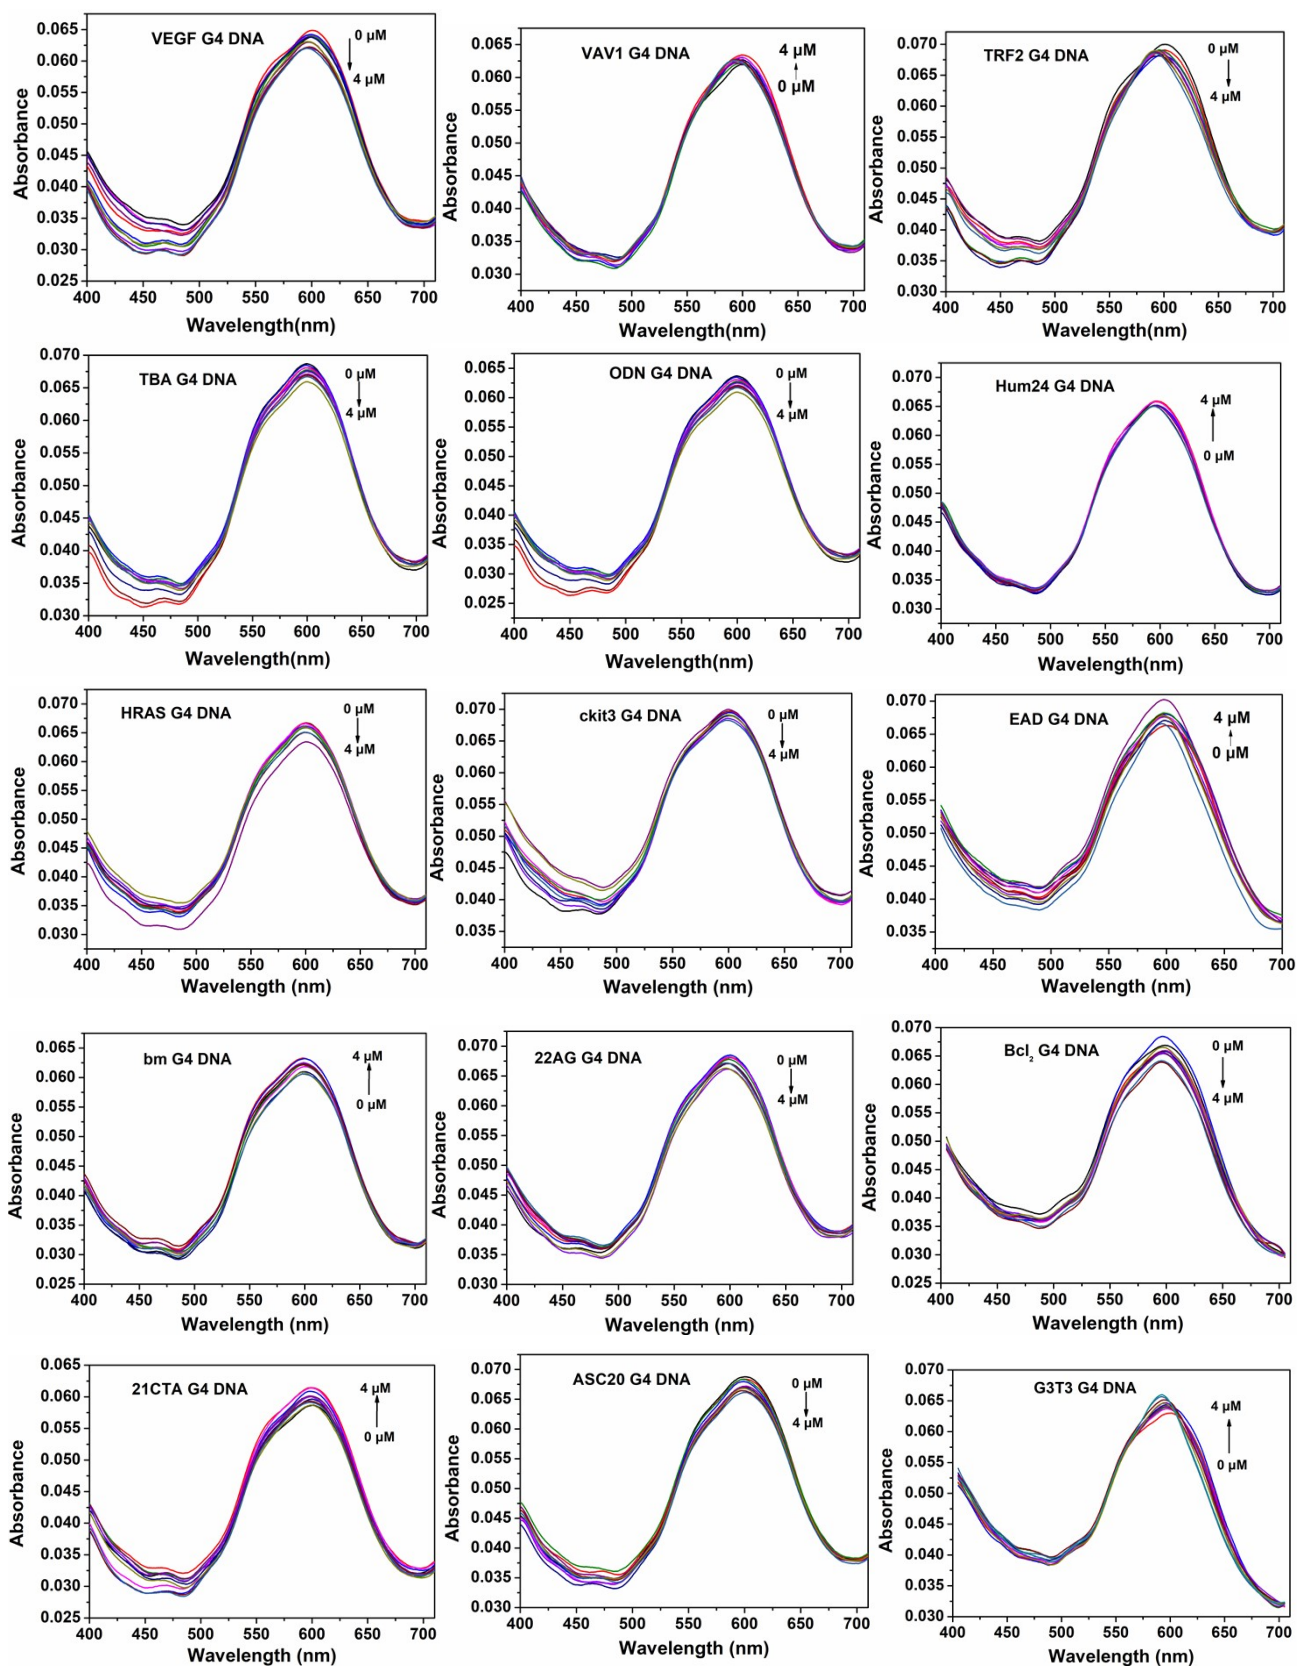

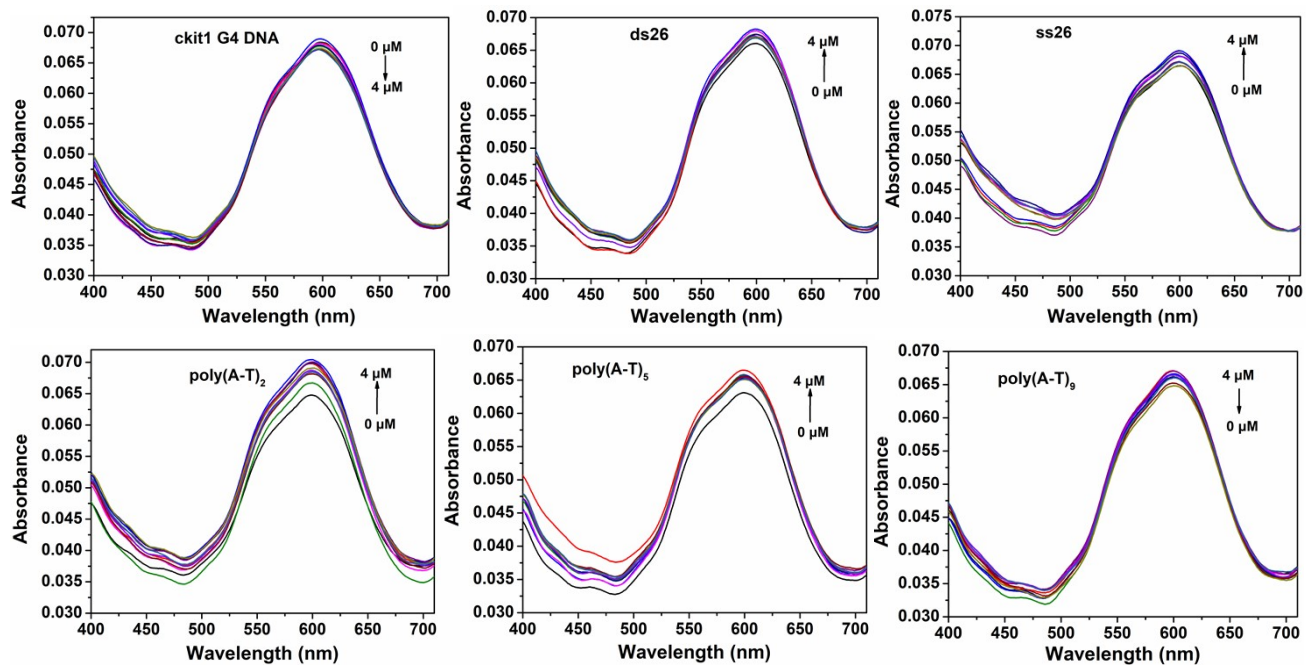

**Fig. S5.** Absorption titrations of **MRY-3** upon addition of increasing amount of anti-parallel G4 DNAs-21CTA, ASC20, bm, Ckit3, HRAS, TBA; hybrid DNAs-22AG, hum24, ODN, G3T3; parallel G4 DNAs- Bcl2, Ckit1, EAD, TRF2, VAV1, VEGF; double-stranded DNAs-Polyd(A-T)<sub>5</sub>, Polyd(A-T)<sub>9</sub>, Polyd(A-T)<sub>2</sub>, ds26 and single-stranded DNA-ss26 in 10 mM Tris-HCl buffer (pH 7.4, containing 60 mM KCl); Condition: [**MRY-3**] = 1  $\mu$ M, [DNA] = 0-4  $\mu$ M.

## 8. Absorption properties of MRY-3 with DNAs.

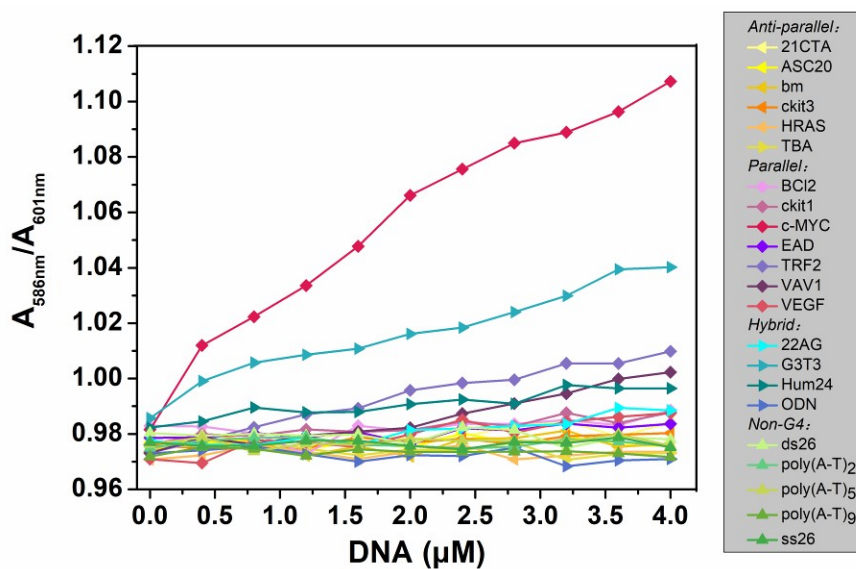

**Fig. S6.** Plots of  $A_{586\text{ nm}}/A_{601\text{ nm}}$  of 1  $\mu\text{M}$  MRY-3 against various DNA concentrations in 10 mM Tris-HCl buffer (pH 7.4, containing 60 mM KCl);

## 9. CD spectra for mutated C-MYC structures.

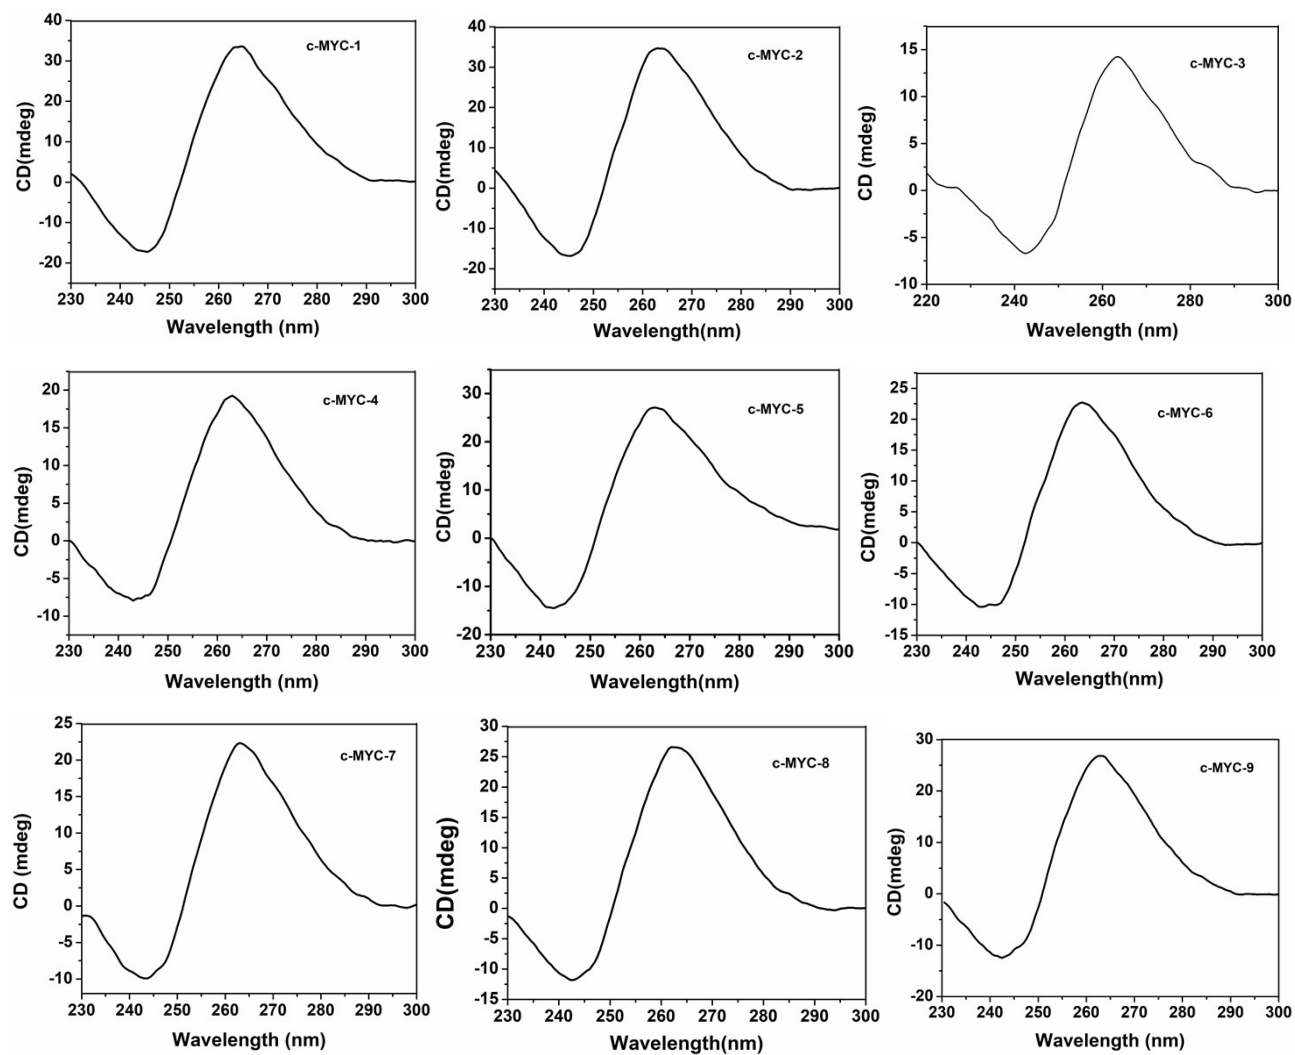

Fig. S7. CD spectra for various mutated C-MYC sequences in 10 mM Tris-HCl/DMSO (95:5, v/v), 60 mM KCl, pH 7.4

## 10. Fluorescence titrations of MRY-3 with mutated C-MYC structures.

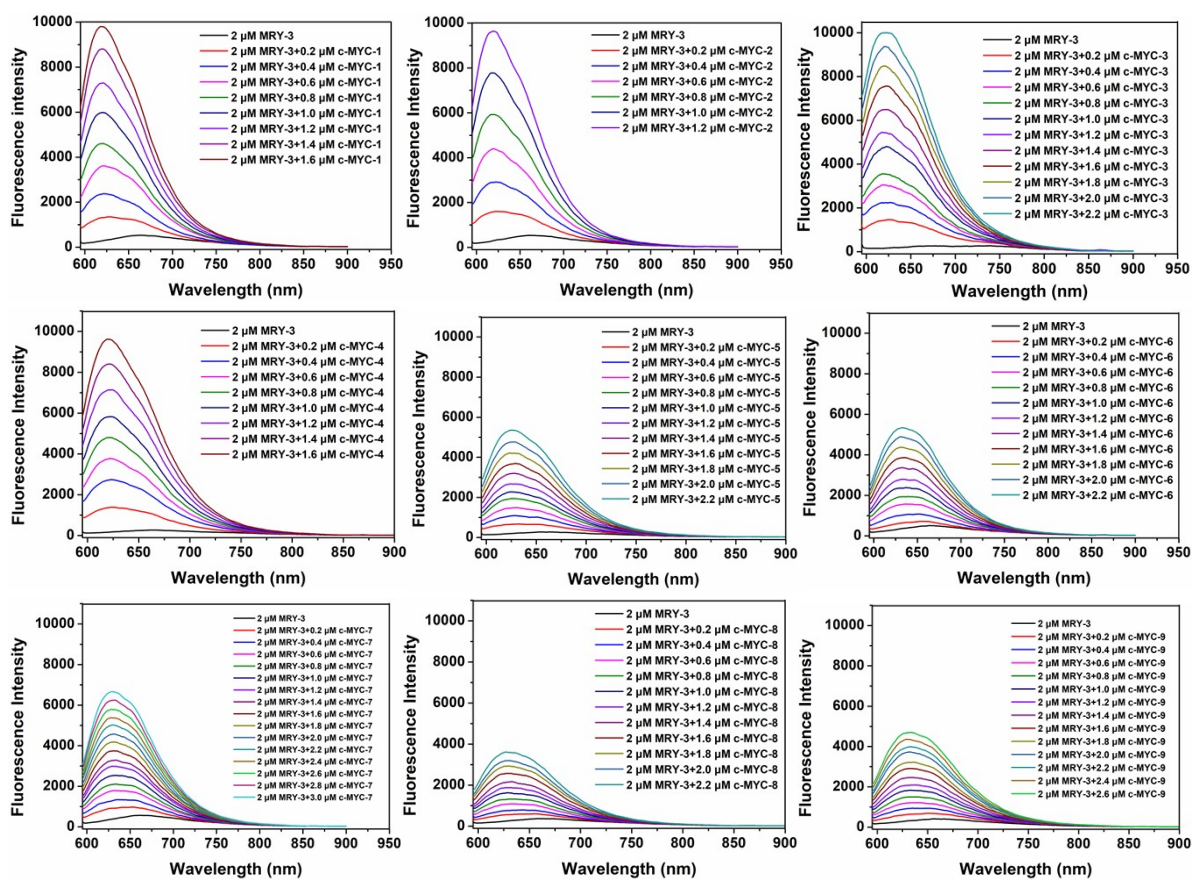

Fig. S8. Fluorescence titrations of MRY-3 (2 μM) upon addition of increasing amount of mutated c-MYC sequences in 10 mM Tris-HCl/DMSO (95:5, v/v), 60 mM KCl, pH 7.4.

## 11. Fluorescence titrations of MRY-3 with AMCA labeled C-MYC DNA structures.

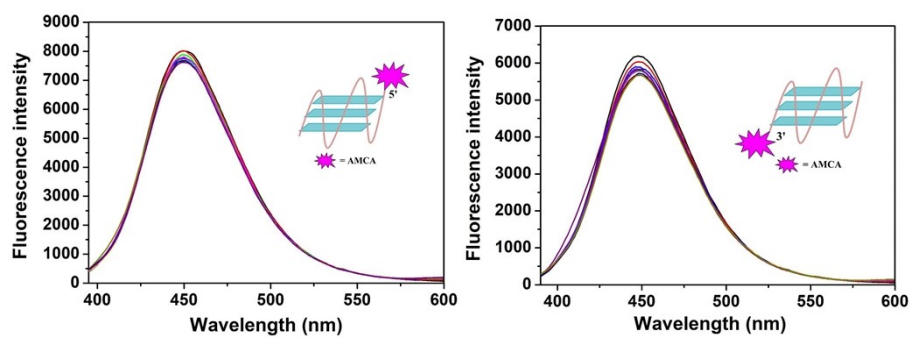

**Fig. S9.** The fluorescence intensity of 5'/3' AMCA-labeled *c-MYC* G4 (0.2  $\mu$ M) with the addition of **MRY-3** (0-1  $\mu$ M) in 10 mM Tris-HCl/DMSO (95:5, v/v), 60 mM KCl, pH 7.4.  $\lambda_{\text{ex}}$  = 353 nm.
